# Supplementary material for: Effectiveness of Intermittent Preventive Treatment with Sulfadoxine-Pyrimethamine in Pregnancy: Low Coverage and High Prevalence of Plasmodium falciparum dhfr-dhps Quintuple Mutants as Major Challenges in Douala, an Urban Setting in Cameroon
Source: MDPI journal article supplement (doi:10.3390/pathogens12060844), 2023-06-19
Supplement: s1 [file s1]

| Supplementary file 1. Timing of the first antenatal care visit, first dose of sulfadoxine-pyrimethamine and the participants’ characteristics |                            |      |              |      |              |      |                   |         |                                         |      |              |      |              |      |                   |         |
|-----------------------------------------------------------------------------------------------------------------------------------------------|----------------------------|------|--------------|------|--------------|------|-------------------|---------|-----------------------------------------|------|--------------|------|--------------|------|-------------------|---------|
|                                                                                                                                               | First antenatal care visit |      |              |      |              |      |                   |         | First dose of sulfadoxine-pyrimethamine |      |              |      |              |      |                   |         |
|                                                                                                                                               | ≤ 16 weeks                 |      | 17–24 weeks  |      | 25+ weeks    |      | Decision variable | p-value | ≤ 16 weeks                              |      | 17–24 weeks  |      | 25+ weeks    |      | Decision variable | p-value |
| Variables                                                                                                                                     | n                          | %    | n            | %    | n            | %    |                   |         | n                                       | %    | n            | %    | n            | %    |                   |         |
| Site                                                                                                                                          |                            |      |              |      |              |      |                   |         |                                         |      |              |      |              |      |                   |         |
| Bonassama                                                                                                                                     | 29                         | 22.5 | 78           | 60.5 | 22           | 17.0 | 7.58†             | 0.11    | 28                                      | 21.7 | 84           | 65.1 | 17           | 13.2 | 8.81†             | 0.06    |
| Deido                                                                                                                                         | 68                         | 25.2 | 153          | 56.7 | 49           | 18.1 |                   |         | 69                                      | 25.4 | 155          | 57.0 | 48           | 17.6 |                   |         |
| St Paul                                                                                                                                       | 74                         | 17.0 | 281          | 64.4 | 81           | 18.6 |                   |         | 71                                      | 17.1 | 272          | 65.5 | 72           | 17.4 |                   |         |
| Age (years old)                                                                                                                               | 26.94 ± 5.14               |      | 26.93 ± 5.13 |      | 26.83 ± 5.99 |      | 0.20†             | 0.98    | 26.99 ± 5.12                            |      | 26.91 ± 5.17 |      | 26.66 ± 5.94 |      | 0.14†             | 0.86    |
| Level of education                                                                                                                            |                            |      |              |      |              |      |                   |         |                                         |      |              |      |              |      |                   |         |
| None                                                                                                                                          | 1                          | 25.0 | 3            | 75.0 | 0            | 0.0  | 9.35†             | 0.15    | 1                                       | 25.0 | 3            | 75.0 | 0            | 0.0  | 11.81†            | 0.06    |
| Primary                                                                                                                                       | 23                         | 20.5 | 64           | 57.1 | 25           | 22.4 |                   |         | 22                                      | 20.6 | 61           | 57.0 | 24           | 22.4 |                   |         |
| Secondary                                                                                                                                     | 88                         | 17.7 | 319          | 64.2 | 90           | 18.1 |                   |         | 85                                      | 17.6 | 319          | 65.9 | 80           | 16.5 |                   |         |
| University                                                                                                                                    | 57                         | 26.3 | 125          | 57.6 | 35           | 16.1 |                   |         | 58                                      | 26.9 | 127          | 58.8 | 31           | 14.3 |                   |         |
| Marital status                                                                                                                                |                            |      |              |      |              |      |                   |         |                                         |      |              |      |              |      |                   |         |
| Single                                                                                                                                        | 118                        | 20.9 | 345          | 61.1 | 102          | 18.0 | 0.28†             | 0.86    | 117                                     | 21.2 | 342          | 62.1 | 92           | 16.7 | 0.35†             | 0.83    |
| Married                                                                                                                                       | 50                         | 19.5 | 158          | 61.5 | 49           | 19.0 |                   |         | 49                                      | 19.4 | 159          | 63.1 | 44           | 17.5 |                   |         |
| Occupation                                                                                                                                    |                            |      |              |      |              |      |                   |         |                                         |      |              |      |              |      |                   |         |
| Agent                                                                                                                                         | 18                         | 16.7 | 67           | 62.0 | 23           | 21.3 | 4.00†             | 0.85    | 18                                      | 16.5 | 67           | 61.5 | 24           | 22.0 | 6.55†             | 0.58    |
| Top Manager                                                                                                                                   | 16                         | 24.2 | 41           | 62.1 | 9            | 13.7 |                   |         | 16                                      | 25.4 | 41           | 65.1 | 6            | 9.5  |                   |         |
| Unemployed                                                                                                                                    | 45                         | 19.7 | 137          | 60.1 | 46           | 20.2 |                   |         | 43                                      | 19.5 | 138          | 62.7 | 39           | 17.7 |                   |         |
| Student                                                                                                                                       | 43                         | 21.0 | 126          | 61.5 | 36           | 17.5 |                   |         | 43                                      | 21.1 | 127          | 62.3 | 34           | 16.6 |                   |         |

|                                                  |     |      |     |      |     |      |       |       |     |      |     |      |     |      |       |        |
|--------------------------------------------------|-----|------|-----|------|-----|------|-------|-------|-----|------|-----|------|-----|------|-------|--------|
| Housewife                                        | 48  | 22.6 | 129 | 60.8 | 35  | 16.6 |       |       | 47  | 23.0 | 126 | 61.8 | 31  | 15.2 |       |        |
| <b>Received education on malaria</b>             |     |      |     |      |     |      |       |       |     |      |     |      |     |      |       |        |
| No                                               | 103 | 19.0 | 336 | 62.0 | 103 | 19.0 | 2.61‡ | 0.27  | 101 | 19.3 | 332 | 63.4 | 91  | 17.3 | 1.88‡ | 0.38   |
| Yes                                              | 67  | 23.5 | 171 | 60.0 | 47  | 16.5 |       |       | 66  | 23.3 | 172 | 60.8 | 45  | 15.9 |       |        |
| <b>Knowledge on IPTp-SP</b>                      |     |      |     |      |     |      |       |       |     |      |     |      |     |      |       |        |
| No                                               | 125 | 18.7 | 419 | 62.6 | 125 | 18.7 | 6.28‡ | 0.04* | 122 | 18.9 | 412 | 63.7 | 113 | 17.4 | 5.72‡ | 0.005* |
| Yes                                              | 45  | 27.4 | 93  | 56.7 | 26  | 15.9 |       |       | 45  | 26.9 | 99  | 59.3 | 23  | 13.8 |       |        |
| <b>History of malaria</b>                        |     |      |     |      |     |      |       |       |     |      |     |      |     |      |       |        |
| No                                               | 122 | 19.4 | 396 | 62.9 | 112 | 17.7 | 2.66‡ | 0.26  | 119 | 19.5 | 392 | 64.3 | 99  | 16.2 | 3.63‡ | 0.16   |
| Yes                                              | 42  | 22.7 | 104 | 56.2 | 39  | 21.1 |       |       | 43  | 23.4 | 104 | 56.5 | 37  | 20.1 |       |        |
| <b>Implementation of prevention plan at home</b> |     |      |     |      |     |      |       |       |     |      |     |      |     |      |       |        |
| No                                               | 37  | 20.7 | 110 | 61.5 | 32  | 17.8 | 0.58‡ | 0.74  | 32  | 17.5 | 118 | 64.5 | 33  | 18.0 | 0.55‡ | 0.75   |
| Yes                                              | 133 | 20.3 | 402 | 61.4 | 120 | 18.3 |       |       | 109 | 20.0 | 341 | 62.6 | 95  | 17.4 |       |        |
| <b>Parity</b>                                    |     |      |     |      |     |      |       |       |     |      |     |      |     |      |       |        |
| Primiparous                                      | 67  | 22.3 | 177 | 59.0 | 56  | 18.7 | 5.99‡ | 0.19  | 68  | 23.3 | 178 | 61.0 | 46  | 15.7 | 6.51‡ | 0.16   |
| Secundiparous                                    | 62  | 22.9 | 162 | 59.8 | 47  | 17.3 |       |       | 59  | 22.6 | 160 | 61.3 | 42  | 16.1 |       |        |
| Multiparous                                      | 40  | 15.4 | 171 | 65.8 | 49  | 18.8 |       |       | 40  | 15.4 | 171 | 65.8 | 49  | 18.8 |       |        |

IPTp-SP: Intermittent preventive treatment during pregnancy with sulfadoxine-pyrimethamine  
 Data are presented as frequency, percentage and mean ± standard deviation  
 Pearson’s independence chi square test was used to compare percentages while one-way analysis of variance was used to compare mean values  
 †Decision variable of the analysis of variance test  
 ‡ Decision variable of the chi-square test  
 \*Statistically significant at p-value < 0.05

**Supplementary file 2.** Prevalence of submicroscopic infections and anaemia by patients' characteristics

|                                   | Submicroscopic infections |              |                |                 | Anemia |              |                |                 |
|-----------------------------------|---------------------------|--------------|----------------|-----------------|--------|--------------|----------------|-----------------|
| Variables                         | N                         | <i>n</i> (%) | χ <sup>2</sup> | <i>p</i> -value | N      | <i>n</i> (%) | χ <sup>2</sup> | <i>p</i> -value |
| Health facilities                 |                           |              |                |                 |        |              |                |                 |
| Bonassama                         | 4                         | 2 (50.0)     | 1.93           | 0.37            | 1      | 0 (0.0)      | n.a            | n.a             |
| Deido                             | 24                        | 16 (66.7)    |                |                 | 225    | 82 (36.4)    |                |                 |
| St Paul                           | 52                        | 40 (76.9)    |                |                 |        |              |                |                 |
| Age groups                        |                           |              |                |                 |        |              |                |                 |
| [14 - 17[†                        | 2                         | 0 (0)        | 9.41           | 0.09            | 3      | 0 (0.0)      | 7.11           | 0.21            |
| [17 - 22[                         | 16                        | 9 (56.3)     |                |                 | 29     | 8 (27.6)     |                |                 |
| [22 - 26[                         | 19                        | 15 (78.9)    |                |                 | 60     | 18 (30.0)    |                |                 |
| [26 - 31[                         | 20                        | 16 (80.0)    |                |                 | 79     | 36 (45.6)    |                |                 |
| [31 - 36[                         | 13                        | 10 (76.9)    |                |                 | 41     | 14 (34.1)    |                |                 |
| ≥ 36                              | 8                         | 7 (87.5)     |                |                 | 11     | 5 (45.5)     |                |                 |
| Level of education                |                           |              |                |                 |        |              |                |                 |
| None†                             | -                         | -            | 5.98           | 0.05            | 2      | 0 (0.0)      | 3.21           | 0.20            |
| Primary                           | 14                        | 7 (50.0)     |                |                 | 40     | 18 (45.0)    |                |                 |
| Secondary                         | 48                        | 35 (72.9)    |                |                 | 130    | 41 (31.5)    |                |                 |
| University                        | 18                        | 16 (88.9)    |                |                 | 53     | 22 (41.5)    |                |                 |
| Marital status                    |                           |              |                |                 |        |              |                |                 |
| Single                            | 58                        | 41 (70.7)    | -              | 0.77#           | 160    | 59 (36.9)    | -              | 0.76#           |
| Married                           | 22                        | 17 (77.3)    |                |                 | 64     | 22 (34.4)    |                |                 |
| Occupation                        |                           |              |                |                 |        |              |                |                 |
| Agent                             | 13                        | 13 (100)     | 7.71           | 0.11            | 30     | 9 (30.0)     | 4.25           | 0.37            |
| Top manager                       | 3                         | 2 (66.7)     |                |                 | 13     | 6 (46.2)     |                |                 |
| Student                           | 23                        | 16 (69.6)    |                |                 | 57     | 15 (26.3)    |                |                 |
| Housewife                         | 14                        | 11 (78.6)    |                |                 | 49     | 19 (38.8)    |                |                 |
| Unemployed                        | 27                        | 16 (59.3)    |                |                 | 71     | 29 (40.8)    |                |                 |
| Implementation of prevention plan |                           |              |                |                 |        |              |                |                 |
| No                                | 22                        | 17 (77.3)    | 0.02           | 0.87            | 60     | 18 (30.0)    | -              | 0.33#           |
| Yes                               | 49                        | 37 (75.5)    |                |                 | 150    | 57 (38.0)    |                |                 |
| Anemia                            |                           |              |                |                 |        |              |                |                 |
| No                                | 16                        | 14 (87.5)    | -              | 0.60#           | -      | -            | n.a            | n.a             |
| Yes                               | 9                         | 7 (77.8)     |                |                 | -      | -            |                |                 |
| IPTp-SP doses                     |                           |              |                |                 |        |              |                |                 |
| Below 3                           | 72                        | 51 (70.8)    | -              | 0.43#           | 187    | 68 (36.4)    | -              | 0.99#           |
| Three and above                   | 8                         | 7 (87.5)     |                |                 | 37     | 13 (35.1)    |                |                 |
| ITN use                           |                           |              |                |                 |        |              |                |                 |
| No                                | 28                        | 19 (67.9)    | -              | 0.61#           | 66     | 20 (30.3)    | -              | 0.28#           |
| Yes                               | 52                        | 39 (75.0)    |                |                 | 159    | 61 (38.4)    |                |                 |
| Gestational age at first ANC      |                           |              |                |                 |        |              |                |                 |
| ≤ 16 weeks                        | 15                        | 12 (80.0)    | 1.02           | 0.59            | 40     | 13 (32.5)    | 0.19           | 0.91            |
| 17-24 weeks                       | 45                        | 30 (66.7)    |                |                 | 146    | 52 (35.6)    |                |                 |

|                                              |    |           |      |      |     |           |      |      |
|----------------------------------------------|----|-----------|------|------|-----|-----------|------|------|
| 25+ weeks                                    | 15 | 11 (73.3) |      |      | 35  | 13 (37.1) |      |      |
| <b>Gestational age at first IPTp-SP dose</b> |    |           |      |      |     |           |      |      |
| ≤ 16 weeks                                   | 13 | 11 (84.6) | 1.44 | 0.48 | 38  | 13 (34.2) | 0.36 | 0.83 |
| 17-24 weeks                                  | 42 | 29 (69.0) |      |      | 141 | 50 (35.5) |      |      |
| 25+ weeks                                    | 14 | 11 (78.6) |      |      | 32  | 13 (40.6) |      |      |
| <b>Parity</b>                                |    |           |      |      |     |           |      |      |
| Primiparous                                  | 30 | 22 (73.3) | 5.57 | 0.06 | 75  | 31 (41.3) | 2.70 | 0.25 |
| Secundiparous                                | 26 | 15 (57.7) |      |      | 64  | 18 (28.1) |      |      |
| Multiparous                                  | 24 | 21 (87.5) |      |      | 86  | 32 (37.2) |      |      |

---

ANC: Antenatal visit care, IPTp-SP: Intermittent preventive treatment in pregnancy with sulfadoxine and pyrimethamine, ITN: Insecticide-treated net, n.a: Not available, Data are number and proportion (%); †Excluded from statistical analysis, \* Pearson's chi-square test and #Fisher's exact test were used to compare percentage, Statistical significance was set at  $p$ -value < 0.05.
